# Supplementary material for: Safety, Efficacy and Pharmacokinetics of AZD7442 (Tixagevimab/Cilgavimab) for Treatment of Mild-to-Moderate COVID-19: 15-Month Final Analysis of the TACKLE Trial
Source: Springer Nature journal article supplement (doi:10.1007/s40121-024-00931-4), 2024-02-25
Supplement: MOESM1 [file 26779610]

## Supplementary Materials

# **Safety, Efficacy and Pharmacokinetics of AZD7442 (Tixagevimab/Cilgavimab) for Treatment of Mild-to-Moderate COVID-19: 15-Month Final Analysis of the TACKLE Trial**

F.D. Richard Hobbs<sup>1</sup>, Hugh Montgomery<sup>2</sup>, Francisco Padilla<sup>3</sup>, Jesus Abraham Simón-Campos<sup>4</sup>, Douglas Arbetter<sup>5</sup>, Seth Seegobin<sup>6</sup>, Alexandre Kiazand<sup>7</sup>, Katie Streicher<sup>8</sup>, Nuria Martinez-Alier<sup>6\*</sup>, Taylor S. Cohen<sup>8</sup>, Mark T. Esser<sup>8</sup>

*<sup>1</sup>Nuffield Department of Primary Care Health Sciences, University of Oxford, Oxford, UK; <sup>2</sup>Department of Medicine, University College London, London, UK; <sup>3</sup>Centro de Investigación en Cardiología y Metabolismo, Guadalajara, Jalisco, Mexico; <sup>4</sup>Köhler & Milstein Research/Méchnikov Project, and Universidad Autonoma de Yucatan, Mérida, Yucatán, Mexico; <sup>5</sup>Vaccines & Immune Therapies, BioPharmaceuticals R&D, AstraZeneca, Boston, MA, USA; <sup>6</sup>Vaccines & Immune Therapies, BioPharmaceuticals R&D, AstraZeneca, Cambridge, UK; <sup>7</sup>Patient Safety, Chief Medical Office, R&D and Vaccines and Immune Therapies, AstraZeneca, Gaithersburg, MD, USA; <sup>8</sup>Vaccines & Immune Therapies, BioPharmaceuticals R&D, AstraZeneca, Gaithersburg, MD, USA*

*\*Affiliation at the time of this analysis.*

**Correspondence to:** Mark T. Esser

Email: [mark.esser@astrazeneca.com](mailto:mark.esser@astrazeneca.com)

**Fig. S1.** Patient flow through the TACKLE study

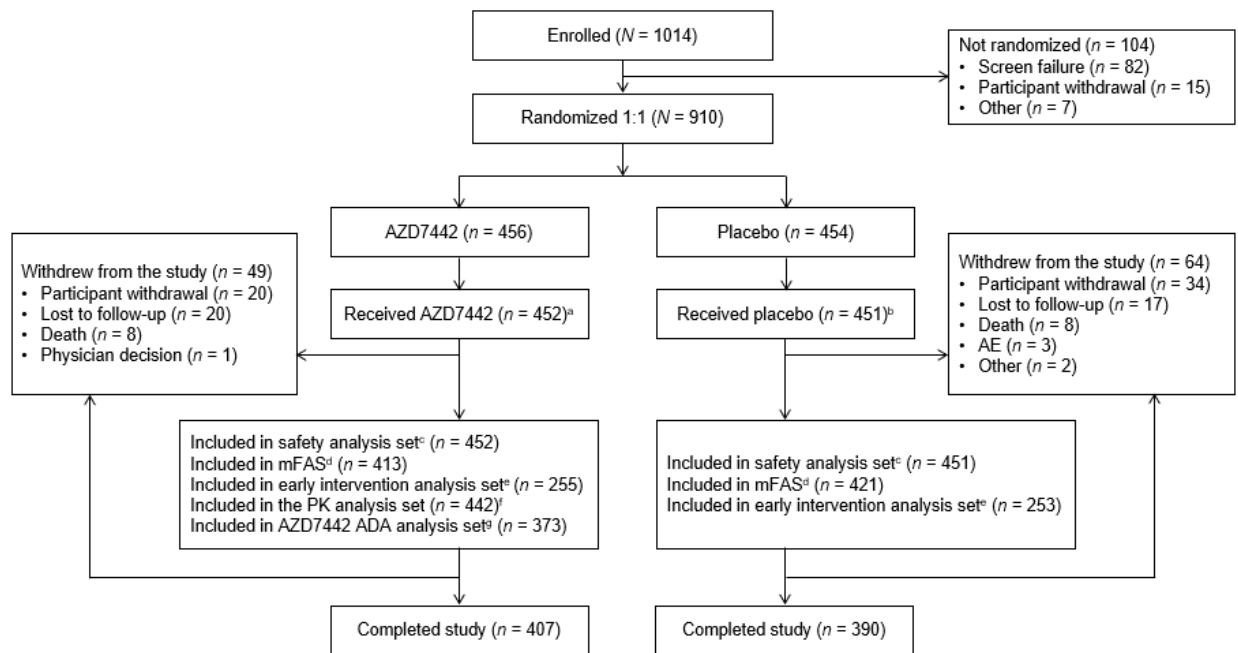

ADA antidrug antibody, AE adverse event, mFAS modified full analysis set

<sup>a</sup>Four participants did not receive AZD7442 due to participant withdrawal ( $n = 3$ ) or physician decision ( $n = 1$ )

<sup>b</sup>Three participants did not receive placebo due to participant withdrawal ( $n = 1$ ) or other reasons ( $n = 2$ )

<sup>c</sup>Comprising all participants who received study drug regardless of baseline hospitalization status

<sup>d</sup>Comprising all participants who received study drug within 7 days of symptom onset and were not hospitalized at baseline (day 1) for isolation purposes (hospitalization was allowed for isolation purposes in Japan and Russia due to local requirements)

<sup>e</sup>Comprising all participants in the mFAS who received study drug within 5 days of symptom onset

<sup>f</sup>Comprising all participants who received AZD7442 and had at least one quantifiable serum pharmacokinetic observation post-dose

<sup>g</sup>Comprising all participants in the safety analysis set who received AZD7442 and were assessed for ADAs at baseline and at least one post-baseline visit

**Fig. S2.** Kaplan–Meier analysis of the primary efficacy endpoint (time to severe COVID-19 or death from any cause through day 29)

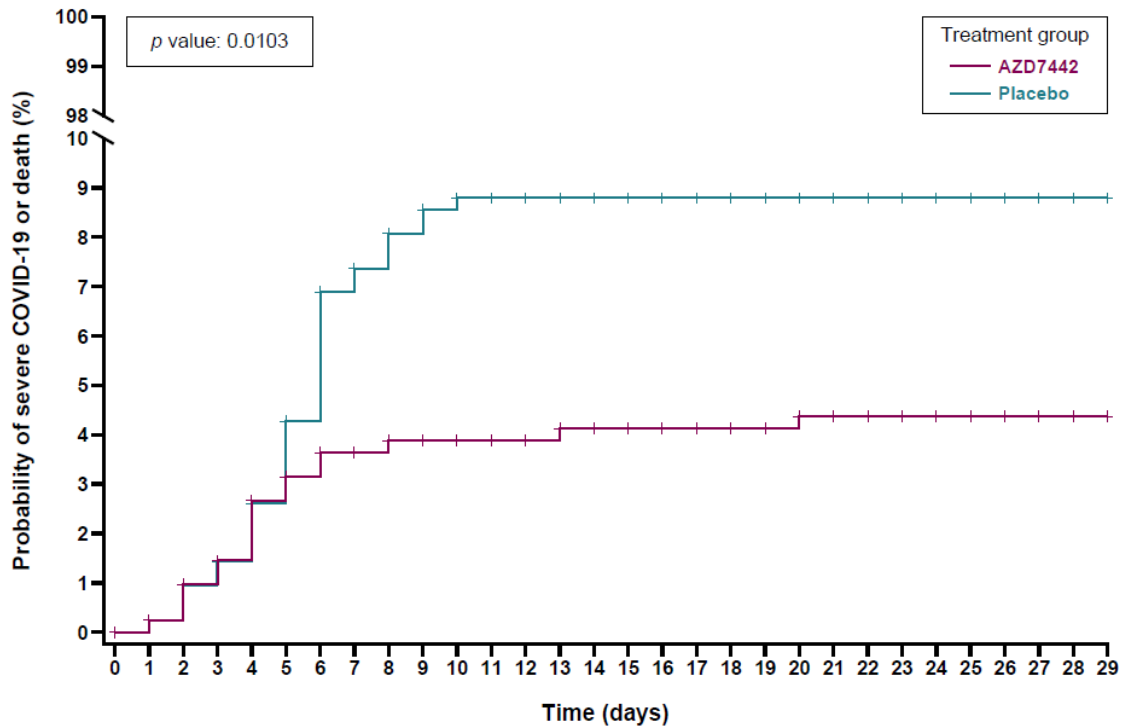

Number of participants at risk

|         |     |     |     |     |     |     |     |     |     |     |     |     |     |     |     |     |     |     |     |     |     |     |     |     |     |     |     |     |   |
|---------|-----|-----|-----|-----|-----|-----|-----|-----|-----|-----|-----|-----|-----|-----|-----|-----|-----|-----|-----|-----|-----|-----|-----|-----|-----|-----|-----|-----|---|
| AZD7442 | 413 | 412 | 409 | 407 | 402 | 399 | 396 | 396 | 394 | 394 | 394 | 394 | 392 | 392 | 391 | 391 | 390 | 390 | 389 | 389 | 389 | 389 | 389 | 388 | 386 | 385 | 376 | 0   |   |
| Placebo | 421 | 420 | 417 | 415 | 410 | 403 | 391 | 389 | 386 | 383 | 381 | 381 | 381 | 381 | 380 | 379 | 379 | 379 | 378 | 378 | 378 | 377 | 377 | 377 | 376 | 375 | 370 | 365 | 0 |

The  $p$  value is based on log-rank test stratified by time from symptom onset ( $\leq 5$  versus  $> 5$  days) and risk of progression to severe COVID-19 (high versus low)

COVID-19 coronavirus disease 2019

**Table S1.** List of study sites and IRB approvals

| Country   | Centre no. | Name and address of IEC/IRB                                                                                                       | Chairman of IEC/IRB | Date of Approval | Approval ID      |
|-----------|------------|-----------------------------------------------------------------------------------------------------------------------------------|---------------------|------------------|------------------|
| Argentina | 202        | CEI Centro de Investigaciones Médicas Mar del Plata<br><br>Av. Colón 3083 5th Floor, Mar del Plata,<br>Buenos Aires, 7600         | Martin Donadio      | 25-Mar-21        | VV-TMF-005864214 |
| Argentina | 203        | Comité de Ética Independiente de la Clínica Privada Independencia,<br><br>Luis María Drago 5681,<br><br>Munro, Buenos Aires, 1605 | Marcelo Baggio      | 05-Apr-21        | VV-TMF-006058052 |
| Argentina | 205        | Comité Independiente de Ética Prof. Dr. Luis<br><br>J. E. Uriburu 774 1st floor,<br><br>Buenos Aires, Caba, C1027AAP              | Luis Zieher         | 10-Apr-21        | VV-TMF-005938003 |
| Argentina | 206        | Comité Independiente de Ética Prof. Dr. Luis<br><br>J. E. Uriburu 774 1st floor,<br><br>Buenos Aires, Caba, C1027AAP              | Luis Zieher         | 20-Apr-21        | VV-TMF-005970977 |

|        |     |                                                                                                                                                                                                                                 |                                  |           |           |
|--------|-----|---------------------------------------------------------------------------------------------------------------------------------------------------------------------------------------------------------------------------------|----------------------------------|-----------|-----------|
| Brazil | 702 | Comitê de Ética em Pesquisa do Hospital das Clínicas da Faculdade de Medicina de Ribeirão Preto da Universidade de São Paulo<br><br>Campus Universitário, SN, Prédio Central, Subsolo<br><br>Ribeirão Preto/SP<br><br>14048-900 | Dra. Mariana Guimarães Villanova | 29-Apr-21 | 4.679.639 |
| Brazil | 704 | Comitê de Ética em Pesquisa do Instituto de Saúde e Bem Estar da Mulher<br><br>Manoel da Nóbrega Street, 784<br><br>São Paulo/SP<br><br>04001-002                                                                               | Valdinéia Agnelo Pires da Silva  | 06-May-21 | 4.696.784 |
| Brazil | 706 | Comitê de Ética em Pesquisa INVESTIGA - Institutos de Pesquisa<br><br>Dr. Romeu Tórtima Avenue, 739<br><br>Campinas/SP<br><br>13084-791                                                                                         | Cristiana Madjarof               | 12-May-21 | 4.707.118 |

|                |                  |                                                                                                                                                                                                       |                                              |           |           |
|----------------|------------------|-------------------------------------------------------------------------------------------------------------------------------------------------------------------------------------------------------|----------------------------------------------|-----------|-----------|
| Brazil         | 707              | Comitê de Ética em Pesquisa em Seres Humanos CEPH da Fundação Universidade Regional de Blumenau<br><br>Antonio da Veiga Street, 140 Bloco A 2 <sup>nd</sup> Floor<br><br>Blumenau/SC<br><br>89030-903 | Professor Márcio Cristiano de Souza Rastelli | 12-May-21 | 4.707.536 |
| Brazil         | 709              | Comitê de Ética em Pesquisa do Hospital das Clínicas de Porto Alegre<br><br>Ramiro Barcelos Street, 2350 Room 2229<br><br>Porto Alegre/RS<br><br>90035-903                                            | Têmis Maria Félix                            | 05-May-21 | 4.692.755 |
| Czech Republic | 1901             | Eticka komise Cesky Tesin<br><br>Hrabinska 895/50,<br><br>Cesky Tesin,<br><br>737 01                                                                                                                  | Mgr. Petr Papuga                             | 29-Mar-21 | 1/2021    |
| Czech Republic | Central:<br>1901 | <a href="#">Eticka komise Fakultni nemocnice Ostrava</a><br><br>17. listopadu 1790/5,<br><br>Ostrava – Poruba,<br><br>708 52                                                                          | Doc. MUDr. Karol Zelenik, Ph.D., MBA         | 25-Mar-21 | 255/2021  |

|                |                  |                                                                                                                  |                                      |           |                     |
|----------------|------------------|------------------------------------------------------------------------------------------------------------------|--------------------------------------|-----------|---------------------|
| Czech Republic | 1902             | <a href="#">Etická komise Oblastní nemocnice Kolin, a.s.</a><br>Zizkova 146,<br>Kolin<br>280 02                  | Martin Novacek                       | 26-Mar-21 | KO-016/2021         |
| Czech Republic | Central:<br>1902 | <a href="#">Etická komise Fakultní nemocnice Ostrava</a><br>17. listopadu 1790/5,<br>Ostrava – Poruba,<br>708 52 | Doc. MUDr. Karol Zelenik, Ph.D., MBA | 25-Mar-21 | 255/2021            |
| Czech Republic | 1903             | Etická komise pro Pardubickou a Svitavskou nemocnici<br>Kyjevská 44,<br>Pardubice,<br>532 02                     | MUDr. David Stuchlik                 | 09-Apr-21 | 638/9.4.2021        |
| Czech Republic | Central:<br>1903 | <a href="#">Etická komise Fakultní nemocnice Ostrava</a><br>17. listopadu 1790/5,<br>Ostrava – Poruba,<br>708 52 | Doc. MUDr. Karol Zelenik, Ph.D., MBA | 25-Mar-21 | 255/2021            |
| Germany        | 2602             | <a href="#">Ethikkommission (EC) der Landesärztekammer Hessen</a>                                                | Prof. Dr. med. Sebastian Harder      | 03-Feb-21 | Nr. 9545_AMG_M_2021 |

|         |      |                                                                                                                                                                  |                                                |           |                     |
|---------|------|------------------------------------------------------------------------------------------------------------------------------------------------------------------|------------------------------------------------|-----------|---------------------|
|         |      | Hanauer Landstraße 152,<br>Frankfurt,<br>60314                                                                                                                   |                                                |           |                     |
| Germany | 2603 | <u>Ethikkommission der Landesärztekammer Rheinland-Pfalz,</u><br>Deutschhausplatz 3,<br>Mainz,<br>55116                                                          | Univ.-Prof. Dr. med. Dipl. Ing. Stephan Letzel | 03-Feb-21 | Nr. 9545_AMG_M_2021 |
| Germany | 2604 | <u>EC Landesamt für Gesundheit und Soziales (LAGeSo)</u><br>Geschäftsstelle der Ethik-Kommission des Landes Berlin,<br>Turmstraße 21, Haus A<br>Berlin,<br>10559 | Prof. Dr. med. K. Thomas Moesta                | 03-Feb-21 | Nr. 9545_AMG_M_2021 |
| Germany | 2605 | <u>EC Landesamt für Gesundheit und Soziales (LAGeSo)</u><br>Geschäftsstelle der Ethik-Kommission des Landes Berlin,<br>Turmstraße 21, Haus A<br>Berlin,          | Prof. Dr. med. K. Thomas Moesta                | 01-Mar-21 | Nr. 9545_AMG_M_2021 |



|         |      |                                                                                                                                                                  |                                 |           |                     |
|---------|------|------------------------------------------------------------------------------------------------------------------------------------------------------------------|---------------------------------|-----------|---------------------|
|         |      | 10559                                                                                                                                                            |                                 |           |                     |
| Germany | 2606 | <u>Ethik-Kommission der Medizinischen Fakultät der LMU</u><br>Pettenkoferstr. 8a<br>München,<br>80336                                                            | Prof. Dr. Wolfgang Eisenmenger  | 03-Feb-21 | Nr. 9545_AMG_M_2021 |
| Germany | 2607 | <u>Ethikkommission (EC) der Ärztekammer Nordrhein</u><br>Tersteegenstraße 9<br>Düsseldorf<br>40474                                                               | Prof. Dr. Kurt Racké            | 03-Feb-21 | Nr. 9545_AMG_M_2021 |
| Germany | 2608 | <u>EC Landesamt für Gesundheit und Soziales (LAGeSo)</u><br>Geschäftsstelle der Ethik-Kommission des Landes Berlin,<br>Turmstraße 21, Haus A<br>Berlin,<br>10559 | Prof. Dr. med. K. Thomas Moesta | 03-Feb-21 | Nr. 9545_AMG_M_2021 |
| Germany | 2609 | EC Ethik-Kommission der Ärztekammer Hamburg,<br>Weidestrasse 122b                                                                                                | Prof. Dr. med. Rolf Stahl       | 03-Feb-21 | Nr. 9545_AMG_M_2021 |

|         |                      |                                                                                                                                                                                                                                            |                                                   |           |                     |
|---------|----------------------|--------------------------------------------------------------------------------------------------------------------------------------------------------------------------------------------------------------------------------------------|---------------------------------------------------|-----------|---------------------|
|         |                      | Hamburg,<br>22083                                                                                                                                                                                                                          |                                                   |           |                     |
| Germany | 2610                 | EC Bayerische Landesärztekammer<br>Muehlbaurstraße 16<br>München<br>81677                                                                                                                                                                  | Prof. Dr. med. Hasford                            | 01-Mar-21 | Nr. 9545_AMG_M_2021 |
| Germany | 2612                 | Landesärztekammer Rheinland-Pfalz EC<br>Deutschhausplatz 3<br>Mainz<br>55116                                                                                                                                                               | Univ.-Prof. Dr. med. Dipl. Ing. Stephan<br>Letzel | 22-Apr-21 | Nr. 9545_AMG_M_2021 |
| Hungary | Central:<br><br>3302 | Ethics Committee of Hungary – Central<br>Egészségügyi Tudományos Tanács /<br>Medical Research Council Klinikai<br>Farmakológiai Etikai Bizottság/Ethics<br>Committee for Clinical Pharmacology<br><br>Alkotmány u. 25.<br>Budapest<br>1054 | Prof. Dr. Bitter István                           | 01-Mar-21 | OGYEI/5496-8/2021   |

|         |                      |                                                                                                                                                                                                                            |                         |           |                                 |
|---------|----------------------|----------------------------------------------------------------------------------------------------------------------------------------------------------------------------------------------------------------------------|-------------------------|-----------|---------------------------------|
| Hungary | Central:<br><br>3305 | Ethics Committee of Hungary - Central<br>Egészségügyi Tudományos Tanács /<br>Medical Research Council Klinikai<br>Farmakológiai Etikai Bizottság/Ethics<br>Committee for Clinical Pharmacology<br><br>Budapest<br><br>1054 | Prof. Dr. Bitter István | 01-Mar-21 | OGYEI/5496-8/2021               |
| Italy   | 4101                 | INMI 'L.Spallanzani' - IRCCS<br><br>Via Portuense 292<br><br>Roma, RM<br><br>149                                                                                                                                           | Cinzia Caporale         | 09-Feb-21 | VV-TMF-005801409                |
| Italy   | 4102                 | Comitato Etico dell'Ospedale San Raffaele<br><br>Via Olgettina 60<br><br>Milano<br><br>20132                                                                                                                               | Elisabetta Riva         | 25-Feb-21 | VV-TMF-005845206                |
| Italy   | 4104                 | Comitato Etico Dell'Area Vasta Emilia Nord<br>– Sede di Reggio Emilia<br><br>Viale Umberto I<br><br>Reggio Emilia                                                                                                          | Roberto Giuseppe Grilli | 02-Mar-21 | NA (receipt of CEC<br>approval) |

|       |      |                                                                                                                                                                        |                         |           |                              |
|-------|------|------------------------------------------------------------------------------------------------------------------------------------------------------------------------|-------------------------|-----------|------------------------------|
|       |      | 43123                                                                                                                                                                  |                         |           |                              |
| Italy | 4105 | Comitato Etico Dell'Area Vasta Emilia Nord<br>– Sede di Piacenza<br><br>Via Giuseppe Taverna 49<br><br>Piacenza<br><br>29100                                           | Roberto Giuseppe Grilli | 02-Mar-21 | NA (receipt of CEC approval) |
| Italy | 4108 | Azienda Ospedaliero – Universitaria Pisana<br><br>via A. Cocchi, 7/9<br><br>Pisa<br><br>56121                                                                          | Romano Danesi           | 25-Feb-21 | NA (receipt of CEC approval) |
| Japan | 4301 | Institutional Review Board of Tohoku<br>Medical and Pharmaceutical University<br>Hospital 1-12-1 Fukumuro, Miyagino-ku<br><br>Sendai-shi<br><br>Miyagi<br><br>983-8512 | Kazuhiro Murakami       | 08-Mar-21 | NA                           |
| Japan | 4303 | Maebashi Red Cross Hospital Institutional<br>Review Board 389-1 Asakura-machi                                                                                          | Yutaka Uehara           | 22-Feb-21 | NA                           |

|       |      |                                                                                                                                        |                   |           |    |
|-------|------|----------------------------------------------------------------------------------------------------------------------------------------|-------------------|-----------|----|
|       |      | Maebashi-Shi<br>Gunma<br>371-0811                                                                                                      |                   |           |    |
| Japan | 4304 | Saitama Medical University Hospital<br>Institutional Review Board<br>38 Morohongo Moroyama-machi<br>Iruma-Gun Saitama-Ken<br>350-0495  | Keiji Yamamoto    | 02-Mar-21 | NA |
| Japan | 4305 | Showa University Hospital Institutional<br>Review Board<br>1-5-8, Hatanodai<br>Shinagawa-ku<br>Tokyo<br>142-8666                       | Takaaki Matsuyama | 08-Mar-21 | NA |
| Japan | 4306 | Tokyo Medical University Hachioji Medical<br>Center Institutional Review Board<br>1163, Tatemachi<br>Hachioji-shi<br>Tokyo<br>193-0998 | Hiroyuki Jimbo    | 25-Mar-21 | NA |

|       |      |                                                                                                                                                               |                  |           |    |
|-------|------|---------------------------------------------------------------------------------------------------------------------------------------------------------------|------------------|-----------|----|
| Japan | 4307 | Institutional Review Board of International University of Health and Welfare<br>1-24-1 Minami-Aoyama<br>Amity Nogizaka Bldg.<br>Minato-ku , Tokyo<br>107-0062 | Tsutomu Yamazaki | 25-Feb-21 | NA |
| Japan | 4308 | Center Hospital of the National Center for Global Health and Medicine IRB<br>1-21-1 Toyama Shinjuku-ku Tokyo<br>162-8655                                      | Takeshi Tamaki   | 03-Mar-21 | NA |
| Japan | 4309 | Chiba Aoba Municipal Hospital Institutional Review Board<br>1273-2, Aobacho<br>Chuo-ku Chiba-shi,<br>Chiba<br>260-0852                                        | Tomoyuki Rokkaku | 24-Feb-21 | NA |
| Japan | 4310 | Institutional Review Board of Tokyo Shinagawa Hospital 6-3<br>22 Higashioi<br>Shinagawa-ku, Tokyo                                                             | Masaharu Shinkai | 24-Feb-21 | NA |

|        |                      |                                                                                                                                                                |                                                                                                                          |           |            |
|--------|----------------------|----------------------------------------------------------------------------------------------------------------------------------------------------------------|--------------------------------------------------------------------------------------------------------------------------|-----------|------------|
|        |                      | 140-8522                                                                                                                                                       |                                                                                                                          |           |            |
| Japan  | 4312                 | Rakuwakai Otowa Hospital Institutional Review Board<br><br>2 Otowachinji-cho Yamashina-ku Kyoto-shi<br><br>Kyoto<br><br>607-8062                               | Yuko Wada                                                                                                                | 18-Feb-21 | NA         |
| Mexico | Central:<br><br>4901 | Comité de Etica en Investigación del Instituto Jalisciense de Investigación Clínica Penitenciaria #20<br><br>Colonia Centro, Guadalajara, Jalisco<br><br>44100 | Mtra. Bertha Alicia Ochoa Sanchez<br><br>Dr. Liliana Faviola de la Cerda Trujillo<br><br>Dr. Luis Enrique Colunga Lozano | 06-Jan-21 | CEI-000001 |
| Mexico | Central:<br><br>4902 | Comité de Etica en Investigación del Instituto Jalisciense de Investigación Clínica Penitenciaria #20<br><br>Colonia Centro, Guadalajara, Jalisco<br><br>44100 | Mtra. Bertha Alicia Ochoa Sanchez<br><br>Dr. Liliana Faviola de la Cerda Trujillo<br><br>Dr. Luis Enrique Colunga Lozano | 06-Jan-21 | CEI-000001 |
| Mexico | Central:             | Comité de Etica en Investigación del Instituto Jalisciense de Investigación Clínica Penitenciaria #20                                                          | Mtra. Bertha Alicia Ochoa Sanchez                                                                                        | 06-Jan-21 | CEI-000001 |

|        |                  |                                                                                                                                                                                                         |                                                                                                                  |           |                |
|--------|------------------|---------------------------------------------------------------------------------------------------------------------------------------------------------------------------------------------------------|------------------------------------------------------------------------------------------------------------------|-----------|----------------|
|        | 4903             | Colonia Centro, Guadalajara, Jalisco<br>44100                                                                                                                                                           | Dr. Liliana Faviola de la Cerda Trujillo<br>Dr. Luis Enrique Colunga Lozano                                      |           |                |
| Mexico | Central:<br>4904 | Comité de Etica en Investigación del Instituto Jalisciense de Investigación Clínica Penitenciaria #20<br>Colonia Centro, Guadalajara, Jalisco<br>44100                                                  | Mtra. Bertha Alicia Ochoa Sanchez<br>Dr. Liliana Faviola de la Cerda Trujillo<br>Dr. Luis Enrique Colunga Lozano | 06-Jan-21 | CEI-000001     |
| Mexico | 4905             | Comité de Etica en Investigación de Médica Sur S.A.B de C.V<br>Puente de Piedra No. 150<br>Colonia Toriello Guerra Tlalpan<br>Ciudad de México<br>14050                                                 | Dr. Norberto Carlos Chávez Tapia<br>Dra. Varenka Julieta Barbero Becerra<br>Dra. Eva Juarez Hernandez            | 18-Jan-21 | 01-2021-CEI-30 |
| Mexico | 4906             | Comité de Etica en Investigación del Hospital Universitario "Dr. José Eleuterio González"<br>Francisco Ignacio Madero y Avenida Gonzalitos S/N<br>Colonia Mitras Centro Monterrey , Nuevo León<br>64460 | José Gerardo Garza Leal<br>Dr. C. Guillermo Elizondo Riojas<br>Dr. Mario Alberto Campos Coy                      | 07-Jan-21 | PI21-00005     |



|        |                  |                                                                                                                                                                                                       |                                                                                                                          |           |                   |
|--------|------------------|-------------------------------------------------------------------------------------------------------------------------------------------------------------------------------------------------------|--------------------------------------------------------------------------------------------------------------------------|-----------|-------------------|
| Mexico | 4907             | Comité de Etica en Investigación del Instituto Nacional de Enfermedades Respiratorias Ismael Cosío Villegas Calzada de Tlalpan #4502 Colonia Sección XVI Tlalpan<br><br>Ciudad de México<br><br>14080 | Lic. Adriana Espinosa Jove<br><br>Dra. en C. Blanca Margarita Bazán Perkins<br><br>Dr. Edgar Enrique Sevilla Reyes       | 05-Jan-21 | INER/CEI/083/2021 |
| Mexico | Central:<br>4908 | Comité de Etica en Investigación del Instituto Jalisciense de Investigación Clínica<br><br>Penitenciaria #20<br><br>Colonia Centro, Guadalajara, Jalisco<br><br>44100                                 | Mtra. Bertha Alicia Ochoa Sanchez<br><br>Dr. Liliana Faviola de la Cerda Trujillo<br><br>Dr. Luis Enrique Colunga Lozano | 06-Jan-21 | CEI-000001        |
| Mexico | Central:<br>4909 | Comité de Etica en Investigación del Instituto Jalisciense de Investigación Clínica<br><br>Penitenciaria #20<br><br>Colonia Centro, Guadalajara, Jalisco<br><br>44100                                 | Mtra. Bertha Alicia Ochoa Sanchez<br><br>Dr. Liliana Faviola de la Cerda Trujillo<br><br>Dr. Luis Enrique Colunga Lozano | 06-Jan-21 | CEI-000001        |

|        |                  |                                                                                                                                                                       |                                                                                                                          |           |                           |
|--------|------------------|-----------------------------------------------------------------------------------------------------------------------------------------------------------------------|--------------------------------------------------------------------------------------------------------------------------|-----------|---------------------------|
| Mexico | Central:<br>4910 | Comité de Etica en Investigación del Instituto Jalisciense de Investigación Clínica<br><br>Penitenciaria #20<br><br>Colonia Centro, Guadalajara, Jalisco<br><br>44100 | Mtra. Bertha Alicia Ochoa Sanchez<br><br>Dr. Liliana Faviola de la Cerda Trujillo<br><br>Dr. Luis Enrique Colunga Lozano | 06-Jan-21 | CEI-000001                |
| Mexico | Central:<br>4911 | Comité de Etica en Investigación del Instituto Jalisciense de Investigación Clínica<br><br>Penitenciaria #20<br><br>Colonia Centro, Guadalajara, Jalisco<br><br>44100 | Mtra. Bertha Alicia Ochoa Sanchez<br><br>Dr. Liliana Faviola de la Cerda Trujillo<br><br>Dr. Luis Enrique Colunga Lozano | 06-Jan-21 | CEI-000001                |
| Poland | Central:<br>5704 | Komisja Bioetyczna przy Dolnoslaskiej Izbie Lekarskiej Kazimierza Wielkiego 45<br><br>Wroclaw<br><br>50-077                                                           | Dr n. med. Włodzimierz Bednorz                                                                                           | 08-Apr-21 | Resolution no. 22/04/2021 |
| Poland | Central:<br>5706 | Komisja Bioetyczna przy Dolnoslaskiej Izbie Lekarskiej Kazimierza Wielkiego 45<br><br>Wroclaw<br><br>50-077                                                           | Dr n. med. Włodzimierz Bednorz                                                                                           | 08-Apr-21 | Resolution no. 22/04/2021 |

|                    |      |                                                                                                                                      |                    |           |                  |
|--------------------|------|--------------------------------------------------------------------------------------------------------------------------------------|--------------------|-----------|------------------|
| Russian Federation | 6201 | LEC of "Medical Research Institute" Legal:<br>25A Koli Tomchaka Str. Location:148D<br>Moskovsky prosp.<br>Saint Petersburg<br>196084 | Yuhno Mihail       | 24-Feb-21 | VV-TMF-005749760 |
| Russian Federation | 6202 | St. Pt. State Institution of Health "City<br>polyclinic No 109, Oleko Dundicha Street, 8<br>building 2<br>Saint-Petersburg<br>192283 | Zhagrin Valeri     | 24-Feb-21 | VV-TMF-005749962 |
| Russian Federation | 6205 | Independent Ethics Committee at Joint-<br>Stock Company "Group of Companies<br>Medsi" 16, Krasnaya Presnya str.<br>Moscow<br>123242  | Igor Abramov       | 05-Mar-21 | VV-TMF-005842991 |
| Russian Federation | 6206 | Ethics committee, Pokrovskiy Hosp<br>85, Bolshoy prospect V.O.<br>St.-Petersburg<br>199106                                           | Balyabin Aleksandr | 24-Feb-21 | VV-TMF-005791088 |
| Russian Federation | 6208 | IEC of LLC Clinic OsNova                                                                                                             | Daria Adiatullina  | 01-Apr-21 | VV-TMF-005969985 |

|                    |                  |                                                                                                                                                       |                              |             |                                    |
|--------------------|------------------|-------------------------------------------------------------------------------------------------------------------------------------------------------|------------------------------|-------------|------------------------------------|
|                    |                  | Serebristiy boulevard, 20<br>Saint-Petersburg<br>197227                                                                                               |                              |             |                                    |
| Russian Federation | 6209             | IEC Bayandin Murmansk Regional Clinical Hospital<br>6 Pavlova ul.<br>Murmansk<br>183047                                                               | Viktorina Dolina             | 09-Mar-21   | VV-TMF-005793049                   |
| Russian Federation | 6210             | LEC of Ltd "Astarta" Nakhimova Street, 11<br>Saint-Petersburg<br>199226                                                                               | Stroyev Yuri                 | 01-Mar-21   | VV-TMF-005796218                   |
| Spain              | Central:<br>7001 | CEIM Provincial de Malaga Ethic Committee<br>Provincial de Málaga Ethic Committee<br>Provincial de Málaga<br>Avda. Carlos Haya s/n<br>Malaga<br>29010 | Dr. Manuel Herrera Gutiérrez | 12 Apr 2021 | NA: There is no approval ID itself |
| Spain              | Central:<br>7003 | CEIM Provincial de Malaga Ethic Committee<br>Provincial de Málaga Ethic Committee<br>Provincial de Málaga<br>Avda. Carlos Haya s/n                    | Dr. Manuel Herrera Gutiérrez | 12 Apr 2021 | NA: There is no approval ID itself |

|         |                  |                                                                                                                                                             |                              |             |                                    |
|---------|------------------|-------------------------------------------------------------------------------------------------------------------------------------------------------------|------------------------------|-------------|------------------------------------|
|         |                  | Malaga<br>29010                                                                                                                                             |                              |             |                                    |
| Spain   | Central:<br>7004 | CEIM Provincial de Malaga Ethic Commitee<br>Provincial de Málaga Ethic Commitee<br>Provincial de Málaga<br><br>Avda. Carlos Haya s/n<br><br>Malaga<br>29010 | Dr. Manuel Herrera Gutiérrez | 12 Apr 2021 | NA: There is no approval ID itself |
| Ukraine | 7705             | EC of "Central city clinical hospital of Ivano-Frankivsk city council"114, Mazepy str.<br><br>Ivano-Frankivsk<br>78018                                      | O.V. Tsikhon                 | 18-May-21   | Nr 59                              |
| Ukraine | 7706             | EC of Communal Non-profit Enterprise 'Kherson City Clinical Hospital n.a. Ye.Ye. Karabelesh'22/1, Ushakova Str.<br><br>Kherson,<br>73000                    | O. I. Demediuk               | 13-May-21   | Nr 10-СП                           |
| Ukraine | 7707             | EC of ME Dnipro Multifield Clinical Hospital #4, 31, Blyzhnya street                                                                                        | M.D. Shynkarenko             | 13-May-21   | Nr 11                              |

|                |                  |                                                               |                          |           |                                                 |
|----------------|------------------|---------------------------------------------------------------|--------------------------|-----------|-------------------------------------------------|
|                |                  | Dnipro<br>49102                                               |                          |           |                                                 |
| United Kingdom | Central:<br>2804 | The Old Chapel<br>Royal Standard Place, Nottingham<br>NG1 6FS | Professor Catherine Urch | 06-Jan-21 | REC Ref: 20/HRA/5769<br>IRAS Project ID: 291930 |
| United Kingdom | Central:<br>2816 | The Old Chapel<br>Royal Standard Place, Nottingham<br>NG1 6FS | Professor Catherine Urch | 06-Jan-21 | REC Ref: 20/HRA/5769<br>IRAS Project ID: 291930 |
| United Kingdom | Central:<br>2817 | The Old Chapel<br>Royal Standard Place, Nottingham<br>NG1 6FS | Professor Catherine Urch | 06-Jan-21 | REC Ref: 20/HRA/5769<br>IRAS Project ID: 291930 |
| United Kingdom | Central:<br>2819 | The Old Chapel<br>Royal Standard Place, Nottingham<br>NG1 6FS | Professor Catherine Urch | 06-Jan-21 | REC Ref: 20/HRA/5769<br>IRAS Project ID: 291930 |
| United Kingdom | Central:<br>2821 | The Old Chapel<br>Royal Standard Place, Nottingham<br>NG1 6FS | Professor Catherine Urch | 06-Jan-21 | REC Ref: 20/HRA/5769<br>IRAS Project ID: 291930 |
| United Kingdom | Central:         | The Old Chapel                                                | Professor Catherine Urch | 06-Jan-21 |                                                 |

|                          |                      |                                                                           |                                                        |           |                                                 |
|--------------------------|----------------------|---------------------------------------------------------------------------|--------------------------------------------------------|-----------|-------------------------------------------------|
|                          | 2823                 | Royal Standard Place, Nottingham<br><br>NG1 6FS                           |                                                        |           | REC Ref: 20/HRA/5769<br>IRAS Project ID: 291930 |
| United States of America | Central:<br><br>7801 | Advarra<br><br>6100 Merriweather Dr., Suite 600<br><br>Columbia, MD 21044 | Susan Ebert, MS, CIP<br><br>Luke Gelinas, PhD, MAR, AB | 07-Jan-21 | NA                                              |
| United States of America | Central:<br><br>7802 | Advarra<br><br>6100 Merriweather Dr., Suite 600<br><br>Columbia, MD 21044 | Susan Ebert, MS, CIP Luke Gelinas, PhD,<br>MAR, AB     | 07-Jan-21 | NA                                              |
| United States of America | Central:<br><br>7805 | Advarra<br><br>6100 Merriweather Dr., Suite 600<br><br>Columbia, MD 21044 | Susan Ebert, MS, CIP Luke Gelinas, PhD,<br>MAR, AB     | 07-Jan-21 | NA                                              |
| United States of America | Central:<br><br>7806 | Advarra<br><br>6100 Merriweather Dr., Suite 600<br><br>Columbia, MD 21044 | Susan Ebert, MS, CIP Luke Gelinas, PhD,<br>MAR, AB     | 07-Jan-21 | NA                                              |
| United States of America | Central:<br><br>7807 | Advarra<br><br>6100 Merriweather Dr., Suite 600<br><br>Columbia, MD 21044 | Susan Ebert, MS, CIP Luke Gelinas, PhD,<br>MAR, AB     | 07-Jan-21 | NA                                              |
|                          | Central:             | Advarra                                                                   |                                                        | 07-Jan-21 | NA                                              |

|                          |                  |                                                                   |                                                    |           |    |
|--------------------------|------------------|-------------------------------------------------------------------|----------------------------------------------------|-----------|----|
| United States of America | 7810             | 6100 Merriweather Dr., Suite 600<br>Columbia, MD 21044            | Susan Ebert, MS, CIP Luke Gelinas, PhD,<br>MAR, AB |           |    |
| United States of America | Central:<br>7811 | Advarra<br>6100 Merriweather Dr., Suite 600<br>Columbia, MD 21044 | Susan Ebert, MS, CIP Luke Gelinas, PhD,<br>MAR, AB | 07-Jan-21 | NA |
| United States of America | Central:<br>7812 | Advarra<br>6100 Merriweather Dr., Suite 600<br>Columbia, MD 21044 | Susan Ebert, MS, CIP Luke Gelinas, PhD,<br>MAR, AB | 07-Jan-21 | NA |
| United States of America | Central:<br>7814 | Advarra<br>6100 Merriweather Dr., Suite 600<br>Columbia, MD 21044 | Susan Ebert, MS, CIP Luke Gelinas, PhD,<br>MAR, AB | 07-Jan-21 | NA |
| United States of America | Central:<br>7815 | Advarra<br>6100 Merriweather Dr., Suite 600<br>Columbia, MD 21044 | Susan Ebert, MS, CIP Luke Gelinas, PhD,<br>MAR, AB | 07-Jan-21 | NA |
| United States of America | Central:<br>7816 | Advarra<br>6100 Merriweather Dr., Suite 600<br>Columbia, MD 21044 | Susan Ebert, MS, CIP Luke Gelinas, PhD,<br>MAR, AB | 07-Jan-21 | NA |
|                          | Central:         | Advarra                                                           |                                                    | 07-Jan-21 | NA |



|                          |                  |                                                                   |                                                    |           |    |
|--------------------------|------------------|-------------------------------------------------------------------|----------------------------------------------------|-----------|----|
| United States of America | 7818             | 6100 Merriweather Dr., Suite 600<br>Columbia, MD 21044            | Susan Ebert, MS, CIP Luke Gelinas, PhD,<br>MAR, AB |           |    |
| United States of America | Central:<br>7821 | Advarra<br>6100 Merriweather Dr., Suite 600<br>Columbia, MD 21044 | Susan Ebert, MS, CIP Luke Gelinas, PhD,<br>MAR, AB | 07-Jan-21 | NA |
| United States of America | Central:<br>7825 | Advarra<br>6100 Merriweather Dr., Suite 600<br>Columbia, MD 21044 | Susan Ebert, MS, CIP Luke Gelinas, PhD,<br>MAR, AB | 07-Jan-21 | NA |
| United States of America | Central:<br>7826 | Advarra<br>6100 Merriweather Dr., Suite 600<br>Columbia, MD 21044 | Susan Ebert, MS, CIP Luke Gelinas, PhD,<br>MAR, AB | 07-Jan-21 | NA |
| United States of America | Central:<br>7827 | Advarra<br>6100 Merriweather Dr., Suite 600<br>Columbia, MD 21044 | Susan Ebert, MS, CIP Luke Gelinas, PhD,<br>MAR, AB | 07-Jan-21 | NA |
| United States of America | Central:<br>7829 | Advarra<br>6100 Merriweather Dr., Suite 600<br>Columbia, MD 21044 | Susan Ebert, MS, CIP Luke Gelinas, PhD,<br>MAR, AB | 07-Jan-21 | NA |
|                          | Central:         | Advarra                                                           |                                                    | 07-Jan-21 | NA |

|                          |                  |                                                                   |                                                     |           |    |
|--------------------------|------------------|-------------------------------------------------------------------|-----------------------------------------------------|-----------|----|
| United States of America | 7831             | 6100 Merriweather Dr., Suite 600<br>Columbia, MD 21044            | Susan Ebert, MS, CIP Luke Gelinias, PhD,<br>MAR, AB |           |    |
| United States of America | Central:<br>7833 | Advarra<br>6100 Merriweather Dr., Suite 600<br>Columbia, MD 21044 | Susan Ebert, MS, CIP Luke Gelinias, PhD,<br>MAR, AB | 07-Jan-21 | NA |
| United States of America | Central:<br>7834 | Advarra<br>6100 Merriweather Dr., Suite 600<br>Columbia, MD 21044 | Susan Ebert, MS, CIP Luke Gelinias, PhD,<br>MAR, AB | 07-Jan-21 | NA |
| United States of America | Central:<br>7835 | Advarra<br>6100 Merriweather Dr., Suite 600<br>Columbia, MD 21044 | Susan Ebert, MS, CIP Luke Gelinias, PhD,<br>MAR, AB | 07-Jan-21 | NA |
| United States of America | Central:<br>7836 | Advarra<br>6100 Merriweather Dr., Suite 600<br>Columbia, MD 21044 | Susan Ebert, MS, CIP Luke Gelinias, PhD,<br>MAR, AB | 07-Jan-21 | NA |
| United States of America | Central:<br>7837 | Advarra<br>6100 Merriweather Dr., Suite 600<br>Columbia, MD 21044 | Susan Ebert, MS, CIP Luke Gelinias, PhD,<br>MAR, AB | 07-Jan-21 | NA |
|                          | Central:         | Advarra                                                           |                                                     | 07-Jan-21 | NA |

|                          |      |                                                        |                                                    |  |  |
|--------------------------|------|--------------------------------------------------------|----------------------------------------------------|--|--|
| United States of America | 7838 | 6100 Merriweather Dr., Suite 600<br>Columbia, MD 21044 | Susan Ebert, MS, CIP Luke Gelinas, PhD,<br>MAR, AB |  |  |
|--------------------------|------|--------------------------------------------------------|----------------------------------------------------|--|--|

*IEC* Independent Ethics Committee; *IRB* Institutional Review Board

**Table S2. AEs**

| <b>Event</b>                                    | <b>AZD7442 (N = 452)</b> | <b>Placebo (N = 451)</b> |
|-------------------------------------------------|--------------------------|--------------------------|
| <b>Participants with at least one AE, n (%)</b> | 251 (55.5)               | 252 (55.9)               |
| <b>AEs by Preferred Term</b>                    |                          |                          |
| COVID-19                                        | 51 (11.3)                | 51 (11.3)                |
| Post-acute COVID-19 syndrome                    | 38 (8.4)                 | 29 (6.4)                 |
| COVID-19 pneumonia                              | 26 (5.8)                 | 49 (10.9)                |
| Fatigue                                         | 16 (3.5)                 | 15 (3.3)                 |
| Hypertension                                    | 16 (3.5)                 | 18 (4.0)                 |
| Headache                                        | 13 (2.9)                 | 11 (2.4)                 |
| Vaccination complication                        | 13 (2.9)                 | 13 (2.9)                 |
| Diarrhea                                        | 11 (2.4)                 | 6 (1.3)                  |
| Back pain                                       | 10 (2.2)                 | 10 (2.2)                 |
| Urinary tract infection                         | 10 (2.2)                 | 9 (2.0)                  |
| Arthralgia                                      | 9 (2.0)                  | 8 (1.8)                  |
| Type 2 diabetes mellitus                        | 9 (2.0)                  | 7 (1.6)                  |
| Anosmia                                         | 8 (1.8)                  | 3 (0.7)                  |
| Asthenia                                        | 8 (1.8)                  | 9 (2.0)                  |
| Cough                                           | 8 (1.8)                  | 4 (0.9)                  |
| Dizziness                                       | 8 (1.8)                  | 1 (0.2)                  |
| Injection site pain                             | 8 (1.8)                  | 11 (2.4)                 |
| Diabetes mellitus inadequate control            | 7 (1.5)                  | 4 (0.9)                  |
| Insomnia                                        | 7 (1.5)                  | 2 (0.4)                  |
| Myalgia                                         | 7 (1.5)                  | 4 (0.9)                  |
| Gastroenteritis                                 | 6 (1.3)                  | 2 (0.4)                  |
| Alopecia                                        | 5 (1.1)                  | 7 (1.6)                  |
| Depression                                      | 5 (1.1)                  | 5 (1.1)                  |
| Nausea                                          | 5 (1.1)                  | 3 (0.7)                  |

|                 |         |          |
|-----------------|---------|----------|
| Nasopharyngitis | 4 (0.9) | 8 (1.8)  |
| Dyslipidemia    | 3 (0.7) | 5 (1.1)  |
| Dyspnea         | 3 (0.7) | 11 (2.4) |
| Ligament sprain | 1 (0.2) | 5 (1.1)  |
| Sinusitis       | 1 (0.2) | 6 (1.3)  |

AE adverse event, COVID 19 coronavirus disease 2019

**Table S3. SAEs**

| <b>Event</b>                                                | <b>AZD7442 (N = 452)</b> | <b>Placebo (N = 451)</b> |
|-------------------------------------------------------------|--------------------------|--------------------------|
| <b>Participants with at least one SAE, n (%)</b>            | 46 (10.2)                | 65 (14.4)                |
| <b>AE by System Organ Class, n (%)</b>                      |                          |                          |
| AE by Preferred Term, n (%)                                 |                          |                          |
| <b>Blood and lymphatic system disorders</b>                 | 1 (0.2)                  | 1 (0.2)                  |
| Anemia of malignant disease                                 | 1 (0.2)                  | 0                        |
| Blood loss anemia                                           | 0                        | 1 (0.2)                  |
| <b>Cardiac disorders</b>                                    | 5 (1.1)                  | 5 (1.1)                  |
| Acute myocardial infarction                                 | 2 (0.4)                  | 1 (0.2)                  |
| Arrhythmia                                                  | 0                        | 2 (0.4)                  |
| Acute coronary syndrome                                     | 1 (0.2)                  | 0                        |
| Acute left ventricular failure                              | 1 (0.2)                  | 0                        |
| Atrial fibrillation                                         | 1 (0.2)                  | 0                        |
| Cardiac arrest                                              | 0                        | 1 (0.2)                  |
| Cardiac failure                                             | 0                        | 1 (0.2)                  |
| Myocardial ischemia                                         | 1 (0.2)                  | 0                        |
| Supraventricular extrasystoles                              | 1 (0.2)                  | 0                        |
| <b>Eye disorders</b>                                        | 0                        | 1 (0.2)                  |
| Diabetic retinopathy                                        | 0                        | 1 (0.2)                  |
| <b>Gastrointestinal disorders</b>                           | 0                        | 3 (0.7)                  |
| Gastritis erosive                                           | 0                        | 1 (0.2)                  |
| Gastrointestinal hemorrhage                                 | 0                        | 1 (0.2)                  |
| Esophageal varices hemorrhage                               | 0                        | 1 (0.2)                  |
| Varices esophageal                                          | 0                        | 1 (0.2)                  |
| <b>General disorders and administration site conditions</b> | 1 (0.2)                  | 1 (0.2)                  |
| Death                                                       | 0                        | 1 (0.2)                  |
| Sudden cardiac death                                        | 1 (0.2)                  | 0                        |

|                                                        |          |           |
|--------------------------------------------------------|----------|-----------|
| <b>Hepatobiliary disorders</b>                         | 3 (0.7)  | 2 (0.4)   |
| Cholecystitis chronic                                  | 2 (0.4)  | 0         |
| Biliary colic                                          | 0        | 1 (0.2)   |
| Cholecystitis                                          | 1 (0.2)  | 0         |
| Portal vein thrombosis                                 | 0        | 1 (0.2)   |
| <b>Infections and infestations</b>                     | 29 (6.4) | 49 (10.9) |
| COVID-19 pneumonia                                     | 23 (5.1) | 37 (8.2)  |
| COVID-19                                               | 2 (0.4)  | 9 (2.0)   |
| Appendicitis                                           | 1 (0.2)  | 0         |
| Bacterial diarrhea                                     | 0        | 1 (0.2)   |
| Cellulitis                                             | 1 (0.2)  | 0         |
| Disseminated tuberculosis                              | 0        | 1 (0.2)   |
| Gastroenteritis viral                                  | 1 (0.2)  | 0         |
| Pneumonia bacterial                                    | 1 (0.2)  | 0         |
| Post-acute COVID-19 syndrome                           | 0        | 1 (0.2)   |
| Pseudomonas infection                                  | 0        | 1 (0.2)   |
| Sepsis                                                 | 1 (0.2)  | 0         |
| Septic shock                                           | 0        | 1 (0.2)   |
| Sinusitis                                              | 0        | 1 (0.2)   |
| Superinfection bacterial                               | 0        | 1 (0.2)   |
| <b>Injury, poisoning, and procedural complications</b> | 2 (0.4)  | 3 (0.7)   |
| Forearm fracture                                       | 0        | 1 (0.2)   |
| Foreign body in gastrointestinal tract                 | 0        | 1 (0.2)   |
| Hip fracture                                           | 1 (0.2)  | 0         |
| Jaw fracture                                           | 0        | 1 (0.2)   |
| Road traffic accident                                  | 1 (0.2)  | 0         |
| <b>Musculoskeletal and connective tissue disorders</b> | 1 (0.2)  | 1 (0.2)   |
| Immobilization syndrome                                | 1 (0.2)  | 0         |

|                                                                              |         |         |
|------------------------------------------------------------------------------|---------|---------|
| Intervertebral disc protrusion                                               | 0       | 1 (0.2) |
| <b>Neoplasms benign, malignant, and unspecified (incl. cysts and polyps)</b> | 2 (0.4) | 0       |
| Colorectal cancer metastatic                                                 | 1 (0.2) | 0       |
| Gastric cancer                                                               | 1 (0.2) | 0       |
| <b>Nervous system disorders</b>                                              | 2 (0.4) | 3 (0.7) |
| Loss of consciousness                                                        | 0       | 1 (0.2) |
| Optic neuritis                                                               | 0       | 1 (0.2) |
| Presyncope                                                                   | 1 (0.2) | 0       |
| Superior sagittal sinus thrombosis                                           | 0       | 1 (0.2) |
| Syncope                                                                      | 1 (0.2) | 0       |
| <b>Pregnancy, puerperium, and perinatal conditions</b>                       | 0       | 2 (0.4) |
| Abortion spontaneous                                                         | 0       | 2 (0.4) |
| <b>Psychiatric disorders</b>                                                 | 1 (0.2) | 1 (0.2) |
| Bipolar disorder                                                             | 1 (0.2) | 0       |
| Disorientation                                                               | 0       | 1 (0.2) |
| <b>Renal and urinary disorders</b>                                           | 2 (0.4) | 1 (0.2) |
| Nephrolithiasis                                                              | 1 (0.2) | 1 (0.2) |
| Chronic kidney disease                                                       | 1 (0.2) | 0       |
| Ureteric obstruction                                                         | 0       | 1 (0.2) |
| <b>Reproductive system and breast disorders</b>                              | 0       | 1 (0.2) |
| Adenomyosis                                                                  | 0       | 1 (0.2) |
| Respiratory, thoracic, and mediastinal disorders                             | 1 (0.2) | 2 (0.4) |
| Acute pulmonary oedema                                                       | 0       | 1 (0.2) |
| Pneumothorax                                                                 | 0       | 1 (0.2) |
| Pulmonary embolism                                                           | 1 (0.2) | 0       |
| <b>Skin and subcutaneous tissue disorders</b>                                | 0       | 1 (0.2) |
| Actinic keratosis                                                            | 0       | 1 (0.2) |



|                              |         |         |
|------------------------------|---------|---------|
| <b>Vascular disorders</b>    | 2 (0.4) | 1 (0.2) |
| Hypertensive crisis          | 1 (0.2) | 0       |
| Hypertensive emergency       | 0       | 1 (0.2) |
| Peripheral artery thrombosis | 1 (0.2) | 0       |

COVID 19 coronavirus disease 2019, SAE serious adverse event

**Table S4. AESIs**

| <b>Event</b>                                                | <b>AZD7442 (N = 452)</b> | <b>Placebo (N = 451)</b> |
|-------------------------------------------------------------|--------------------------|--------------------------|
| <b>Participants with at least one AESI, n (%)</b>           | 19 (4.2)                 | 17 (3.8)                 |
| <b>AE by System Organ Class, n (%)</b>                      |                          |                          |
| AE by Preferred Term, n (%)                                 |                          |                          |
| <b>Cardiac disorders</b>                                    | 2 (0.4)                  | 1 (0.2)                  |
| Acute coronary syndrome                                     | 1 (0.2)                  | 0                        |
| Acute myocardial infarction                                 | 0                        | 1 (0.2)                  |
| Myocardial ischemia                                         | 1 (0.2)                  | 0                        |
| <b>General disorders and administration site conditions</b> | 14 (3.1)                 | 13 (2.9)                 |
| Injection site pain                                         | 8 (1.8)                  | 11 (2.4)                 |
| Injection site erythema                                     | 2 (0.4)                  | 2 (0.4)                  |
| Injection site discomfort                                   | 2 (0.4)                  | 1 (0.2)                  |
| Injection site bruising                                     | 1 (0.2)                  | 1 (0.2)                  |
| Injection site hematoma                                     | 1 (0.2)                  | 1 (0.2)                  |
| Injection site induration                                   | 1 (0.2)                  | 0                        |
| Injection site inflammation                                 | 1 (0.2)                  | 0                        |
| Injection site nodule                                       | 1 (0.2)                  | 0                        |
| Injection site warmth                                       | 0                        | 1 (0.2)                  |
| <b>Nervous system disorders</b>                             | 1 (0.2)                  | 0                        |
| Cerebral hypoperfusion                                      | 1 (0.2)                  | 0                        |
| <b>Skin and subcutaneous tissue disorders</b>               | 2 (0.4)                  | 2 (0.4)                  |
| Rash                                                        | 1 (0.2)                  | 1 (0.2)                  |
| Dermatitis allergic                                         | 0                        | 1 (0.2)                  |
| Erythema                                                    | 1 (0.2)                  | 0                        |
| <b>Vascular disorders</b>                                   | 0                        | 2 (0.4)                  |
| Hypertensive emergency                                      | 0                        | 1 (0.2)                  |
| Thrombophlebitis                                            | 0                        | 1 (0.2)                  |

*AES* adverse event of special interest

**Table S5.** Summary of TE-ADAs to AZD7442 and its constituent monoclonal antibodies

|                                            | <b>Tixagevimab<sup>a</sup></b><br><b>(N = 372)</b> | <b>Cilgavimab<sup>b</sup></b><br><b>(N = 363)</b> | <b>AZD7442<sup>c,d</sup></b><br><b>(N = 373)</b> |
|--------------------------------------------|----------------------------------------------------|---------------------------------------------------|--------------------------------------------------|
| <b>Participants with TE-ADAs, n (%)</b>    | 27 (7.3)                                           | 46 (12.7)                                         | 54 (14.5)                                        |
| <b>Median of maximum ADA titer (range)</b> | 320.0<br>(160–1280)                                | 160.0<br>(80–2560)                                | 160.0<br>(80–2560)                               |

ADA antidrug antibody, N number of ADA-evaluable participants, n number of participants with a positive result in the specific ADA category, TEADA treatment-emergent ADA

<sup>a</sup>Assay limit of detection = 80

<sup>b</sup>Assay limit of detection = 40

<sup>c</sup>TE-ADA positivity to AZD7442 was defined as being TE-ADA positive to tixagevimab and/or cilgavimab

<sup>d</sup>TE-ADA positivity was defined as either ADA negative at baseline and ADA positive at  $\geq 1$  post-baseline assessments with ADA titers  $\geq 2$  times the assay limit ( $\geq 160$  for tixagevimab or  $\geq 80$  for cilgavimab), or baseline-positive ADA titer that was boosted  $\geq 4$ -fold during the study period. The N for the AZD7442 ADA-evaluable set comprises all participants with an ADA-evaluable sample for either tixagevimab or cilgavimab
